# Supplementary material for: Activity of a Recombinant Chitinase of the Atta sexdens Ant on Different Forms of Chitin and Its Fungicidal Effect against Lasiodiplodia theobromae
Source: MDPI journal article supplement (doi:10.3390/polym16040529), 2024-02-15
Supplement: s1 [file s1]

**Activity of a Recombinant Chitinase of the *Atta sexdens* Ant on Different Forms of the Chitin, and Its Fungicidal Effect Against *Lasiodiplodia theobromae***

Katia Celina Santos Correa<sup>a</sup>, William Marcondes Facchinatto<sup>b</sup>, Filipe Biagioni Habitzreuter<sup>c</sup>, Gabriel Henrique Ribeiro<sup>d</sup>, Lucas Gomes Rodrigues<sup>a</sup>, Kelli Cristina Micocci<sup>a</sup>, Sérgio Paulo Campana-Filho<sup>c</sup>, Luiz Alberto Colnago<sup>d</sup>, Dulce Helena Ferreira Souza<sup>a</sup>

<sup>a</sup> Department of Chemistry, Federal University of Sao Carlos (UFSCar), Rd. Washington Luis, km 235, CEP – 13565-905, Sao Carlos, SP, Brasil.

<sup>b</sup> Aveiro Institute of Materials (CICECO), Department of Chemistry, University of Aveiro, R. Santiago, CP – 3810-193, Aveiro, Portugal.

<sup>c</sup> Sao Carlos Institute of Chemistry, University of Sao Paulo (IQSC-USP), Av. Trabalhador Sao-carlense 400, CEP – 13560-590, Sao Carlos, SP, Brasil.

<sup>d</sup> Brazilian Agricultural Research Corporation (Embrapa Instrumentation), R. XV de Novembro 1452, CEP – 13560-970, São Carlos, SP, Brasil.

\*Corresponding author:

Dulce Helena F. Souza

E-mail address: [dulce@ufscar.br](mailto:dulce@ufscar.br)

Phone number: +55 16 3351 8074

Department of Chemistry, Federal University of São Carlos

Rd. Washington Luis, km 235, CEP – 13565-905

São Carlos - SP, Brasil

## Summary

| Captions                                                                                               | Page      |
|--------------------------------------------------------------------------------------------------------|-----------|
| <b>Figure S1.</b> GlcNAc chemical structure.                                                           | <b>S2</b> |
| <b>Figure S2.</b> COZY $^1\text{H}$ - $^1\text{H}$ NMR spectrum for GlcNAc.                            | <b>S4</b> |
| <b>Figure S3.</b> Enzymatic activity in the presence of colloidal $\alpha$ -chitin substrate at 28 °C. | <b>S5</b> |

| Caption                                                                                                                      | Page      |
|------------------------------------------------------------------------------------------------------------------------------|-----------|
| <b>Table S1.</b> Assignments of the $^1\text{H}$ NMR spectra in $\text{D}_2\text{O}$ for the N-acetyl-d-glucosamine compound | <b>S3</b> |

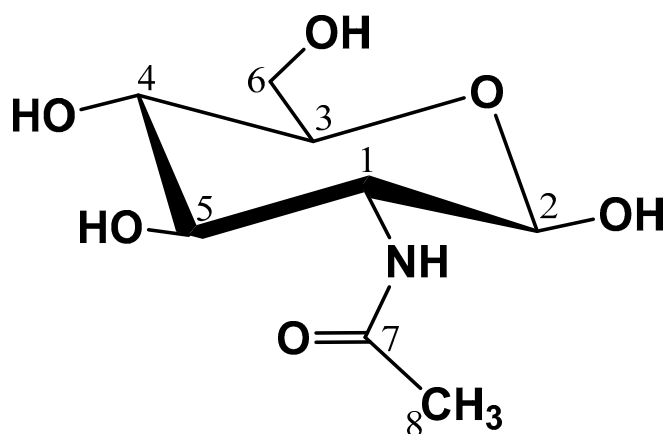

**Figure 1S.** GlcNAc chemical structure.

**Table 1S.** Assignments of the  $^1\text{H}$  NMR spectra in  $\text{D}_2\text{O}$  for the N-acetyl-d-glucosamine compound. Chemical shifts (ppm), multiplicity, and coupling constants (Hz)

| No. | $^1\text{H}$    |
|-----|-----------------|
| 1'  | 3.88 (m)        |
| 2'  | 5.19 d (2.8 Hz) |
| 3'  | 3.40 – 3.95 (m) |
| 4'  | 3.40 – 3.59 (m) |
| 5'  | 3.40 – 3.95 (m) |
| 6'  | 3.40 – 3.95 (m) |
| NH  | 8.09 d (8.0 Hz) |
| 7'  | -               |
| 8'  | 2.03 s          |

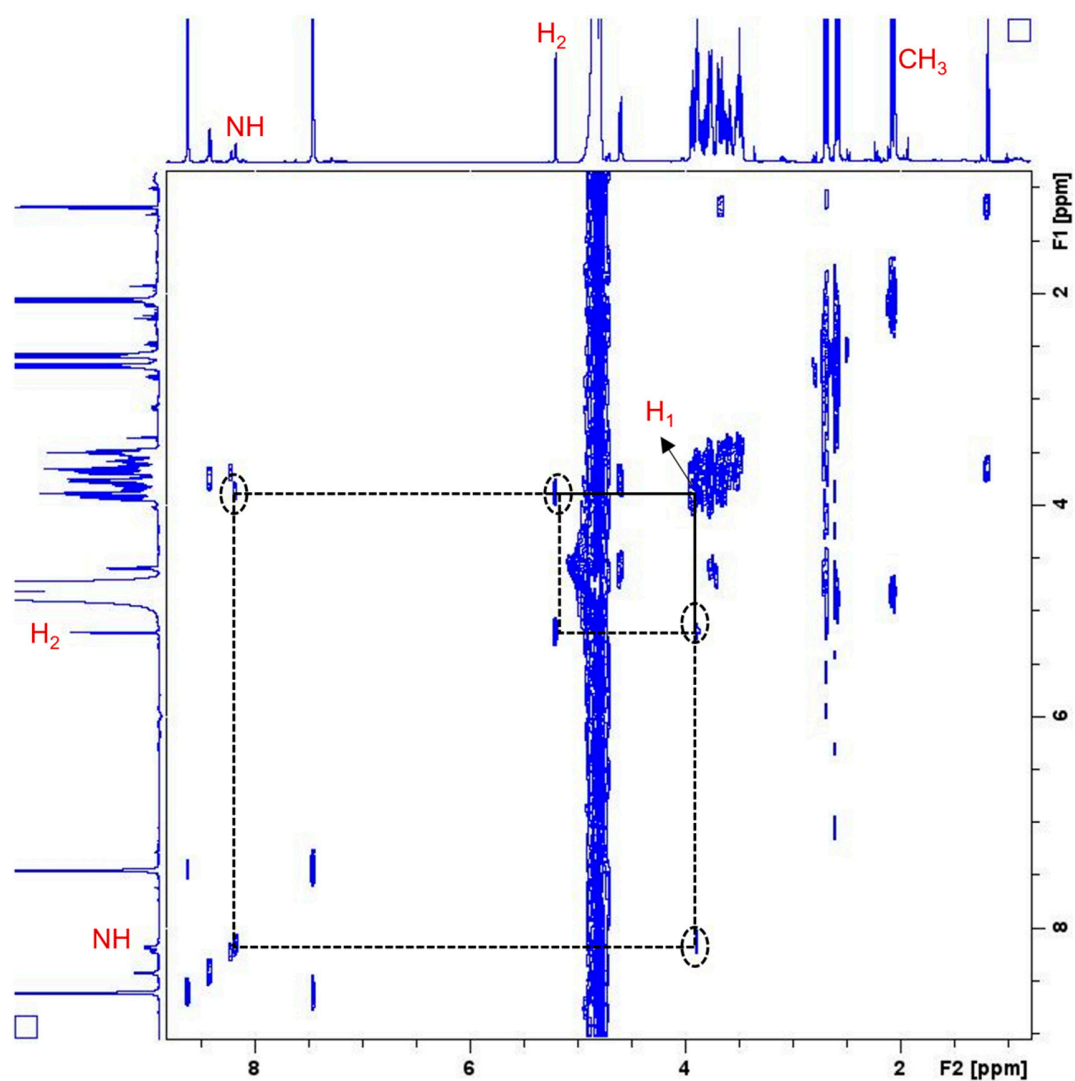

**Figure S2.** COZY  $^1\text{H}$ - $^1\text{H}$  NMR spectrum for GlcNAc. Signals of the N-acetyl-d-glucosamine hydrolyzed product are highlighted.

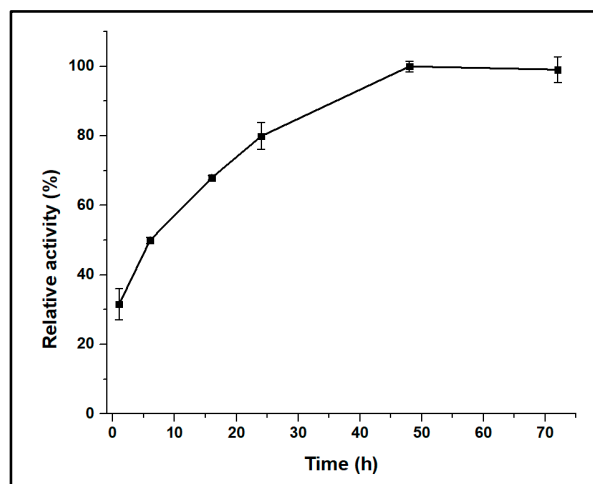

**Figure S3.** Enzymatic activity in the presence of colloidal  $\alpha$ -chitin substrate at 28 °C.
